# Supplementary material
Source: Springer Nature journal article supplement (https://www.springermedizin.de/resource/supplementary/12879_2012_1975_MOESM1_ESM.pdf/9443502)
Supplement: MOESM1 [file 9443502]

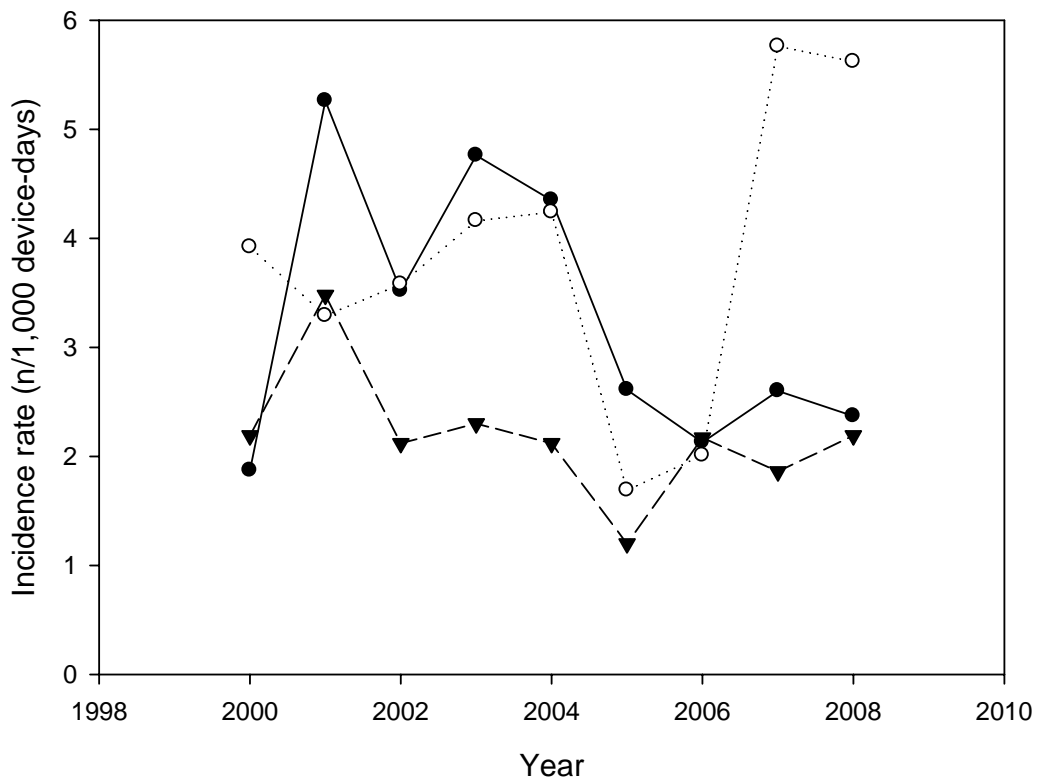

- Ventilator-associated pneumonia (mean 3.18%,  $p < 0.001$ )
- Catheter-associated urinary tract infection (mean 3.76%,  $p < 0.001$ )
- ▼- Central line-associated bloodstream infection (mean 2.11%,  $p < 0.001$ )
